# Supplementary material
Source: Springer Nature journal article supplement (https://www.springermedizin.de/resource/supplementary/12865_2014_581_MOESM4_ESM.pdf/9428282)

**A****PIE cells**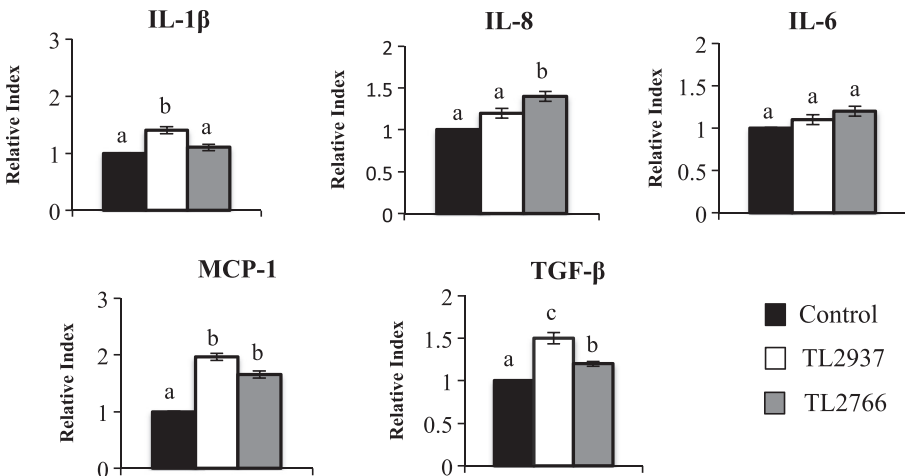**B****Antigen presenting cells**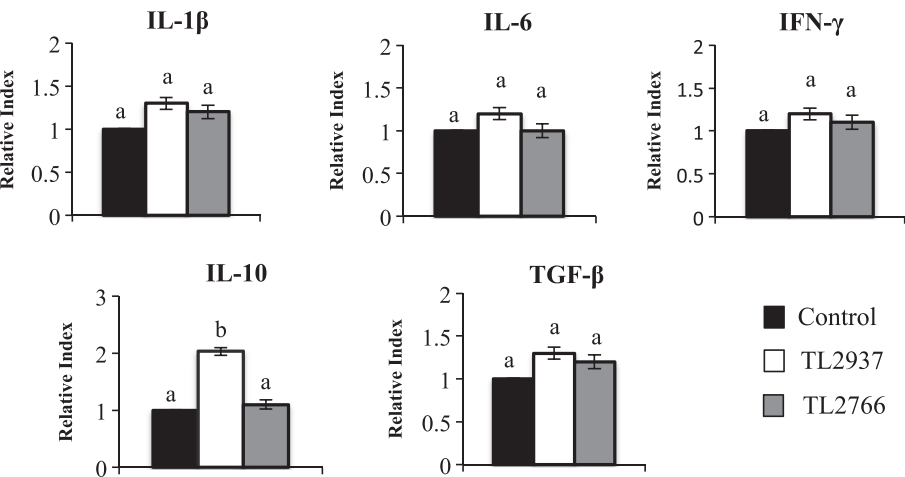

Supplement: MOESM4 [file 9428282]
